# Supplementary material for: The lattice reconstruction of Cs-introduced FAPbI1.80Br1.20 enables improved stability for perovskite solar cells
Source: Royal Society of Chemistry journal article supplement (doi:10.1039/d0ra09294k), 2021-01-01
Supplement: d0ra09294k1.pdf [file d0ra09294k1.pdf]

Supporting Information

**Lattice Reconstruction of Cs-Introduced FAPb<sub>1.80</sub>Br<sub>1.20</sub> Enables Improved Stability for Perovskite Solar Cells**

Shuang Chen, Lu Pan, Tao Ye, Nuo Lei, Yijun Yang and Xi Wang\*

Key Laboratory of Luminescence and Optical Information, Ministry of Education, Department of Physics, School of Science, Beijing Jiaotong University, Beijing, 100044, China.

\* Corresponding author email: [xiwang@bjtu.edu.cn](mailto:xiwang@bjtu.edu.cn).

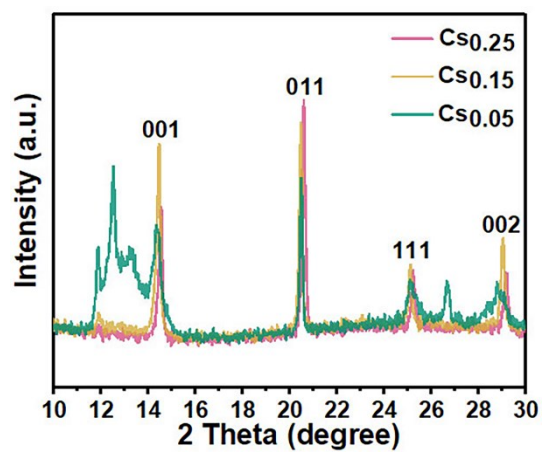

**Fig. S1** XRD detail of Cs<sub>x</sub>FA<sub>1-x</sub>PbI<sub>1.80</sub>Br<sub>1.20</sub> (x = 0.05, 0.15, 0.25) perovskite films.

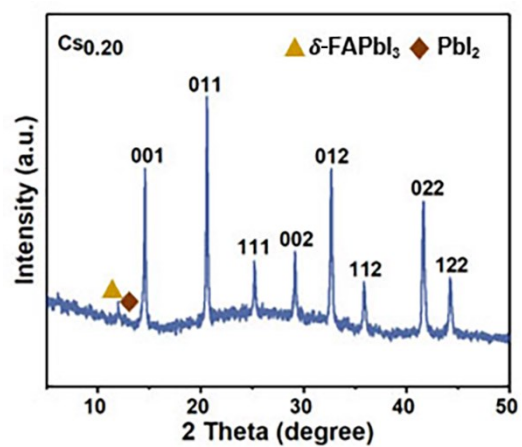

**Fig. S2** XRD spectrum of Cs<sub>0.20</sub>FA<sub>0.80</sub>PbI<sub>1.80</sub>Br<sub>1.20</sub> perovskite film.

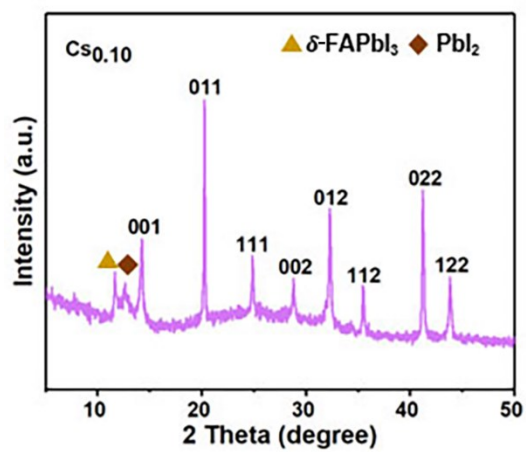

**Fig. S3** XRD spectrum of  $\text{Cs}_{0.10}\text{FA}_{0.90}\text{PbI}_{1.80}\text{Br}_{1.20}$  perovskite film.

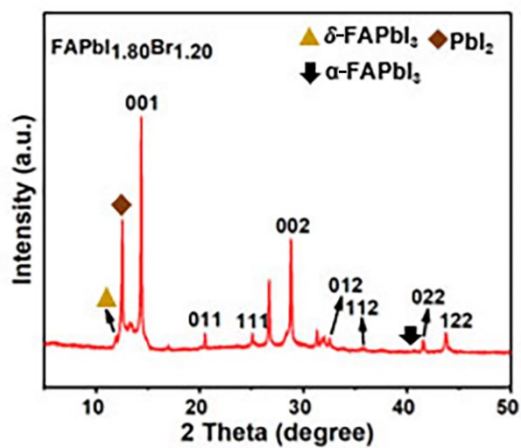

**Fig. S4** XRD spectrum of  $\text{FAPb}_{1.80}\text{Br}_{1.20}$  perovskite film.

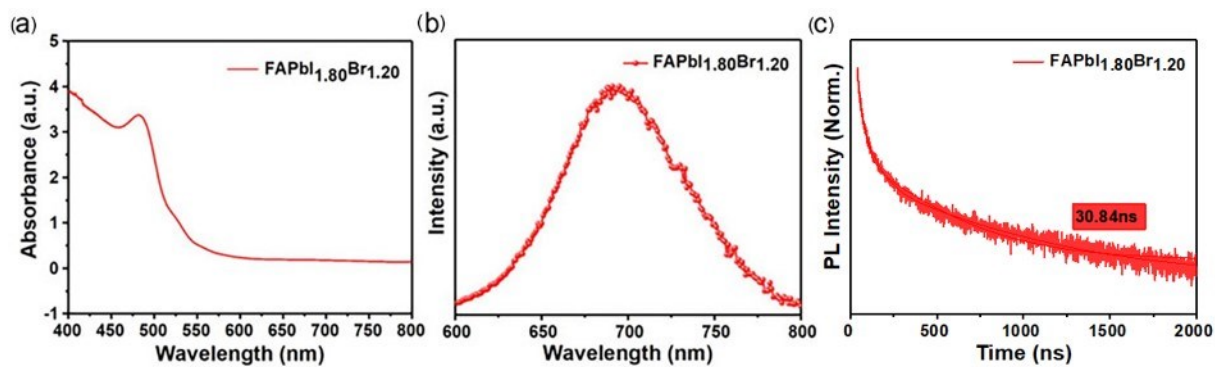

**Fig. S5** Optical characterization of FAPb<sub>1.80</sub>Br<sub>1.20</sub>. (a) Absorption spectrum of FAPb<sub>1.80</sub>Br<sub>1.20</sub> film. (b) Photoluminescence spectrum of FAPb<sub>1.80</sub>Br<sub>1.20</sub> film. (c) TRPL spectrum of FAPb<sub>1.80</sub>Br<sub>1.20</sub> film.

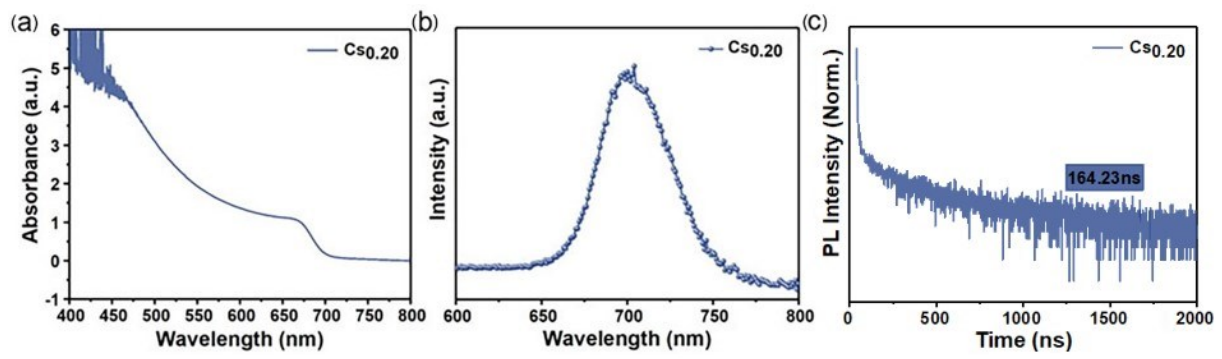

**Fig. S6** Optical characterization of  $\text{Cs}_{0.20}\text{FA}_{0.80}\text{PbI}_{1.80}\text{Br}_{1.20}$ . (a) Absorption spectrum of  $\text{Cs}_{0.20}\text{FA}_{0.80}\text{PbI}_{1.80}\text{Br}_{1.20}$  film. (b) Photoluminescence spectrum of  $\text{Cs}_{0.20}\text{FA}_{0.80}\text{PbI}_{1.80}\text{Br}_{1.20}$  film. (c) TRPL spectrum of  $\text{Cs}_{0.20}\text{FA}_{0.80}\text{PbI}_{1.80}\text{Br}_{1.20}$  film.

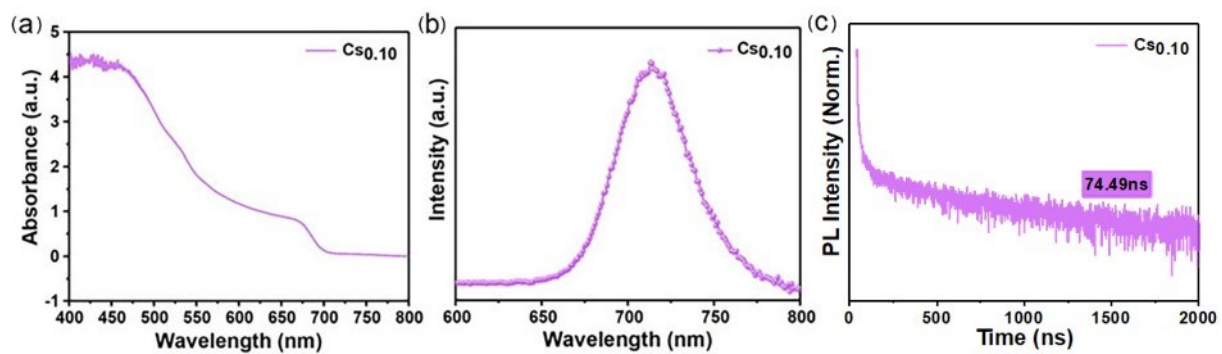

**Fig. S7** Optical characterization of  $\text{Cs}_{0.10}\text{FA}_{0.90}\text{PbI}_{1.80}\text{Br}_{1.20}$ . (a) Absorption spectrum of  $\text{Cs}_{0.10}\text{FA}_{0.90}\text{PbI}_{1.80}\text{Br}_{1.20}$  film. (b) Photoluminescence spectrum of  $\text{Cs}_{0.10}\text{FA}_{0.90}\text{PbI}_{1.80}\text{Br}_{1.20}$  film. (c) TRPL spectrum of  $\text{Cs}_{0.10}\text{FA}_{0.90}\text{PbI}_{1.80}\text{Br}_{1.20}$  film.



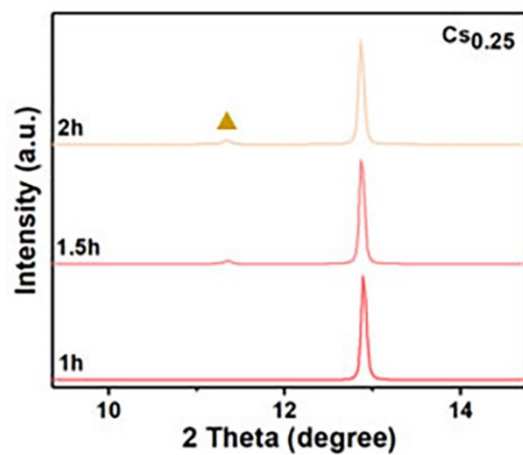

**Fig. S8** Mixed-halide perovskite films heated on a 200 °C hotplate inside a  $\text{N}_2$ -filled glovebox for 2 hours. Zoom-in corresponding to the  $\text{Cs}_{0.25}\text{FA}_{0.75}\text{PbI}_{1.80}\text{Br}_{1.20}$  perovskite films.

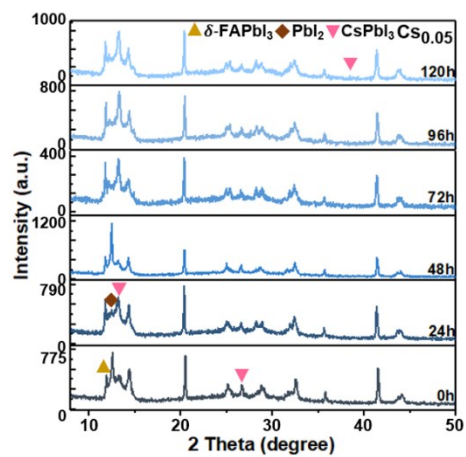

**Fig. S9** Stability test (environmental condition 25 °C, 55-60% humidity). Zoom-in corresponding to the Cs<sub>0.05</sub>FA<sub>0.95</sub>Pb<sub>1.80</sub>Br<sub>1.20</sub> perovskite films.

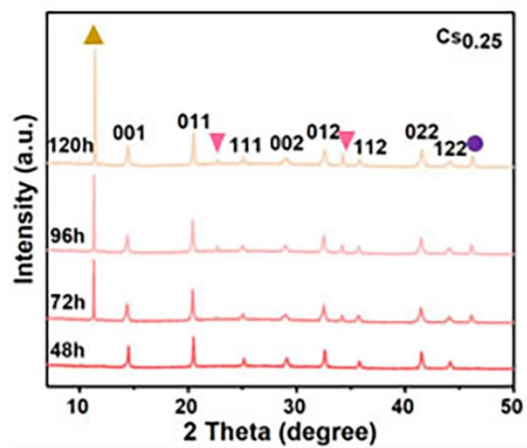

**Fig. S10** Stability test (environmental condition 25 °C, 55-60% humidity). Zoom-in corresponding to the  $\text{Cs}_{0.25}\text{FA}_{0.75}\text{PbI}_{1.80}\text{Br}_{1.20}$  perovskite films.

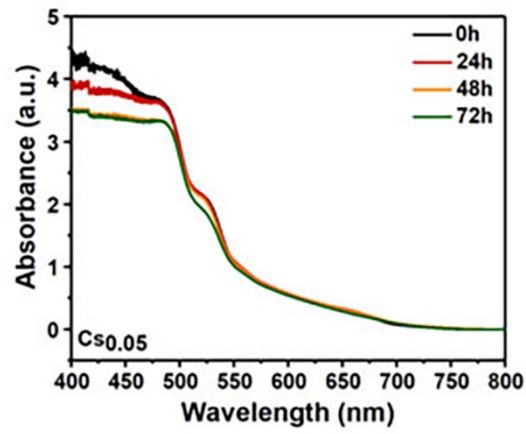

**Fig. S11** Air stability and film formation dependence on processing conditions. UV-visible absorption of  $\text{Cs}_{0.05}\text{FA}_{0.95}\text{PbI}_{1.80}\text{Br}_{1.20}$  films for 0 h, 24 h, 48 h, 72 h in wet.

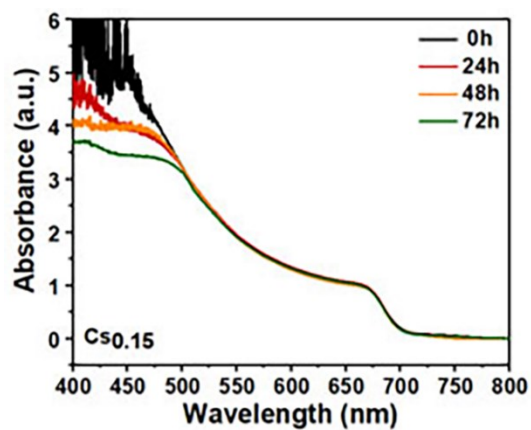

**Fig. S12** Air stability and film formation dependence on processing conditions. UV- visible absorption of  $\text{Cs}_{0.15}\text{FA}_{0.85}\text{PbI}_{1.80}\text{Br}_{1.20}$  films for 0 h, 24 h, 48 h, 72 h in wet.

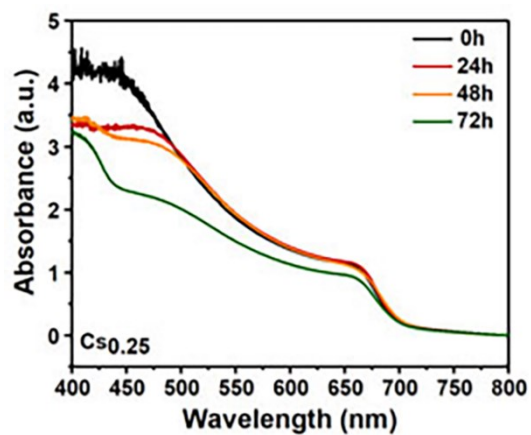

**Fig. S13** Air stability and film formation dependence on processing conditions. UV- visible absorption of  $\text{Cs}_{0.25}\text{FA}_{0.75}\text{PbI}_{1.80}\text{Br}_{1.20}$  films for 0 h, 24 h, 48 h, 72 h in wet.

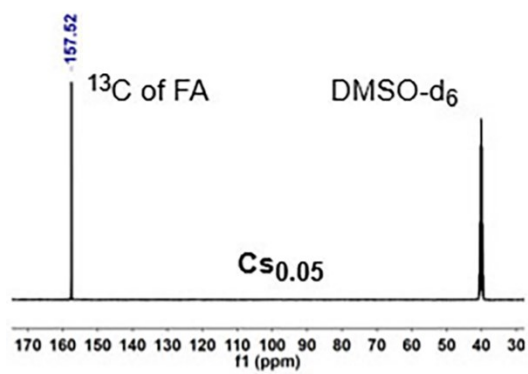

**Fig. S14** Liquid-state  $^{13}\text{C}$ -NMR spectrum of  $\text{Cs}_{0.05}\text{FA}_{0.95}\text{PbI}_{1.80}\text{Br}_{1.20}$  precipitate powder in  $\text{DMSO-d}_6$ .

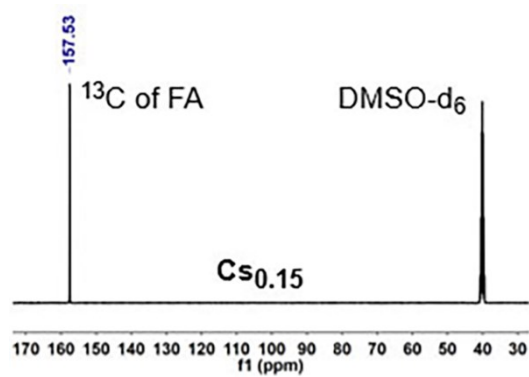

**Fig. S15** Liquid-state  $^{13}\text{C}$ -NMR spectrum of  $\text{Cs}_{0.15}\text{FA}_{0.85}\text{PbI}_{1.80}\text{Br}_{1.20}$  precipitate powder in  $\text{DMSO-d}_6$ .



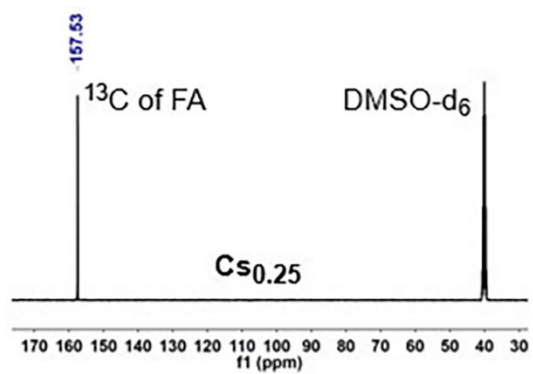

**Fig. S16** Liquid-state  $^{13}\text{C}$ -NMR spectrum of  $\text{Cs}_{0.25}\text{FA}_{0.75}\text{PbI}_{1.80}\text{Br}_{1.20}$  precipitate powder in  $\text{DMSO-d}_6$ .

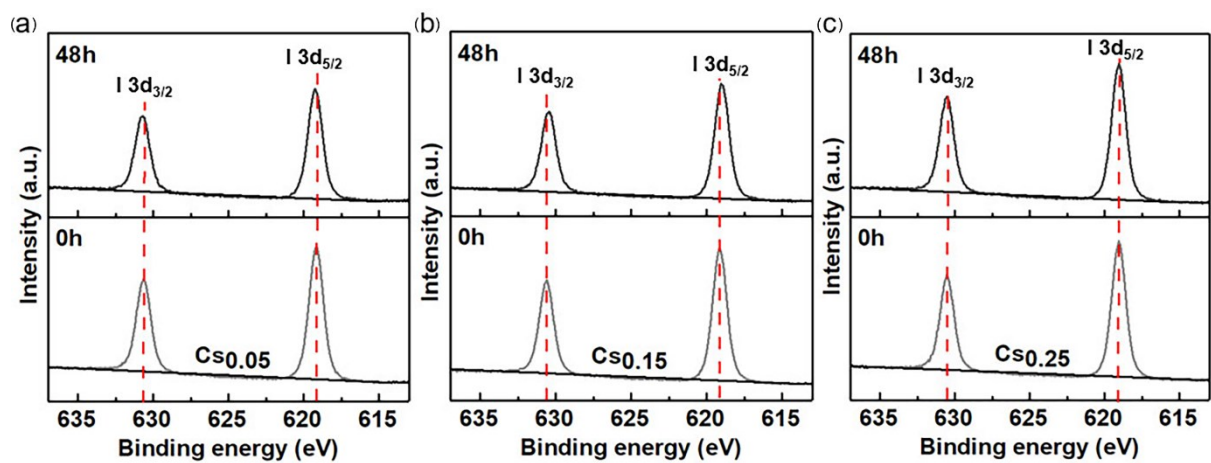

**Fig. S17** Stability test (environmental condition 25 °C, 55-60% humidity). XPS spectra of I 3d<sub>3/2</sub> and I 3d<sub>5/2</sub> of Cs<sub>x</sub>FA<sub>1-x</sub>PbI<sub>1.80</sub>Br<sub>1.20</sub> (x = 0.05, 0.15, 0.25) perovskite thin films in wet.

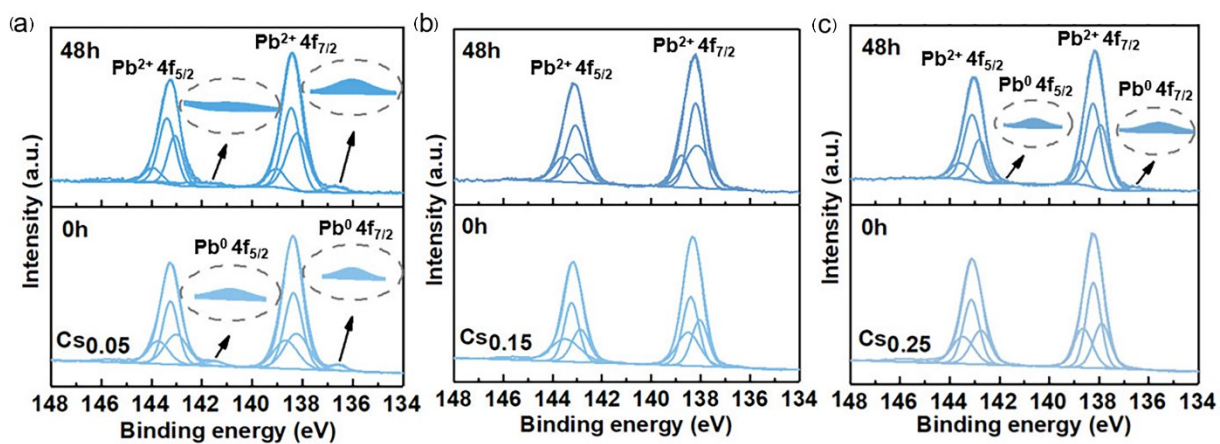

**Fig. S18** Stability test (environmental condition 25 °C, 55-60% humidity). XPS spectra of Pb 4f<sub>5/2</sub> and Pb 4f<sub>7/2</sub> of Cs<sub>x</sub>FA<sub>1-x</sub>PbI<sub>1.80</sub>Br<sub>1.20</sub> (x = 0.05, 0.15, 0.25) perovskite thin films in wet.

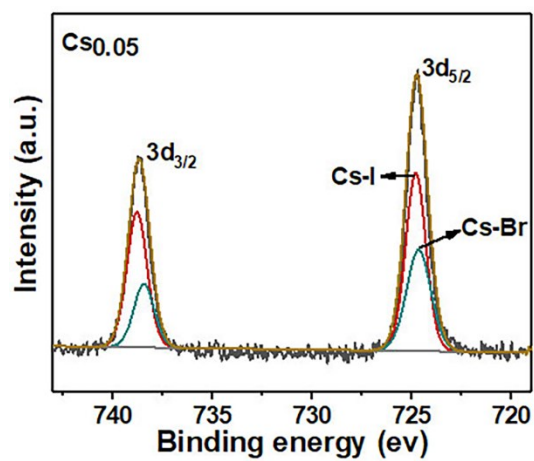

**Fig. S19** XPS spectrum of Cs 3d<sub>3/2</sub> and Cs 3d<sub>5/2</sub> of Cs<sub>0.05</sub>FA<sub>0.95</sub>PbI<sub>1.80</sub>Br<sub>1.20</sub> perovskite thin film.

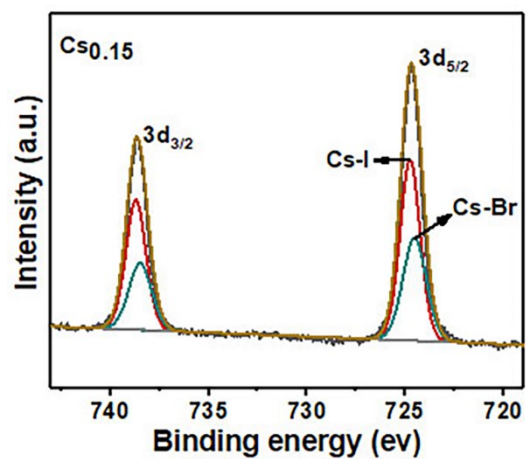

**Fig. S20** XPS spectrum of Cs  $3d_{3/2}$  and Cs  $3d_{5/2}$  of  $\text{Cs}_{0.15}\text{FA}_{0.85}\text{Pb}_{1.80}\text{Br}_{1.20}$  perovskite thin film.

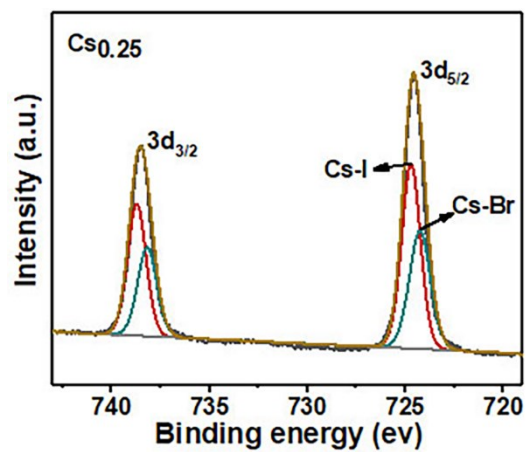

**Fig. S21** XPS spectrum of Cs 3d<sub>3/2</sub> and Cs 3d<sub>5/2</sub> of Cs<sub>0.25</sub>FA<sub>0.75</sub>PbI<sub>1.80</sub>Br<sub>1.20</sub> perovskite thin film.

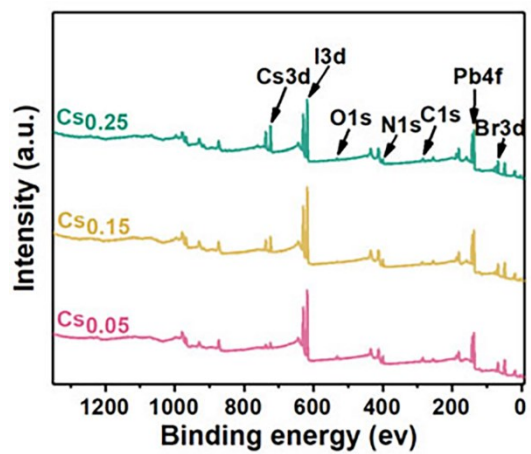

Fig. S22 XPS spectra for different Cs/FA ratio mixed cation thin films.

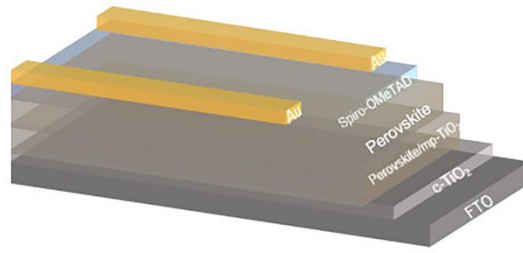

**Fig. S23** Device structure of PSCs with glass/FTO/c-TiO<sub>2</sub>/mp-TiO<sub>2</sub>/perovskite/Spiro-OMeTAD/Au.



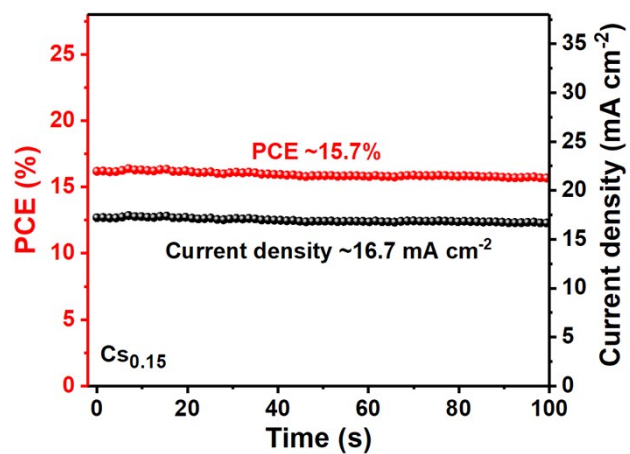

**Fig. S24** Steady-state PCE and current density of the champion device (Cs<sub>0.15</sub>) measured at maximum-power point of 0.86 V.

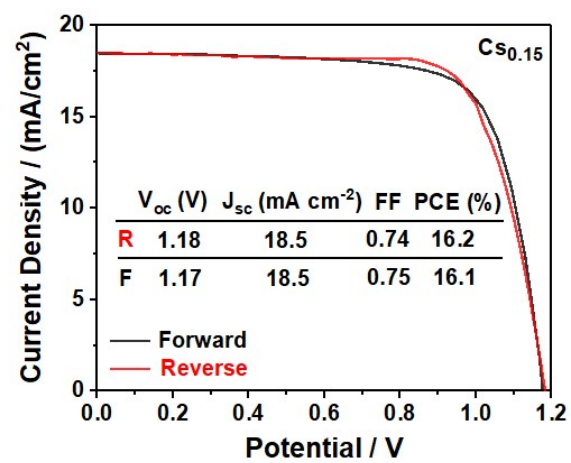

**Fig. S25** J-V curves of the champion device ( $\text{Cs}_{0.15}$ ) in reverse and forward scan directions.

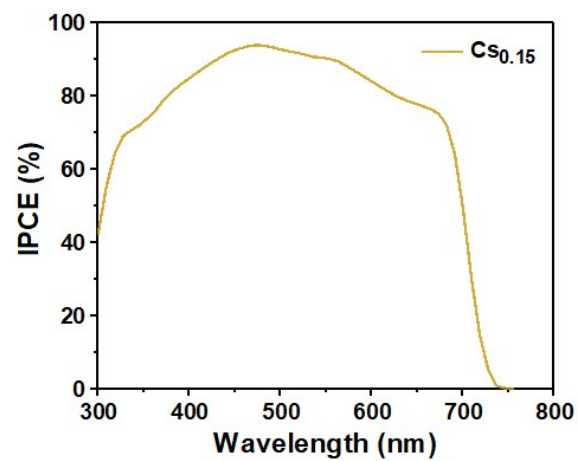

**Fig. S26** Incident-photon-to-current-efficiency (IPCE) spectrum of 15% Cs<sup>+</sup> incorporated PSCs.

**Table S1** TRPL results. The obtained carrier lifetimes of  $\text{Cs}_x\text{FA}_{1-x}\text{PbI}_{1.80}\text{Br}_{1.20}$  ( $x = 0, 0.10, 0.20$ ) perovskite films.

| Perovskite                                                          | A <sub>1</sub> (%) | $\tau_1$ (ns) | A <sub>2</sub> (%) | $\tau_2$ (ns) | Lifetime (ns) |
|---------------------------------------------------------------------|--------------------|---------------|--------------------|---------------|---------------|
| $\text{Cs}_{0.20}\text{FA}_{0.80}\text{PbI}_{1.80}\text{Br}_{1.20}$ | 33.44              | 2.05          | 10.0               | 170.74        | 164.23        |
| $\text{Cs}_{0.10}\text{FA}_{0.90}\text{PbI}_{1.80}\text{Br}_{1.20}$ | 91.34              | 2.82          | 10.03              | 94.06         | 74.49         |
| $\text{FAPbI}_{1.80}\text{Br}_{1.20}$                               | 16.24              | 12.94         | 1.19               | 73.71         | 30.84         |
